# Supplementary material
Source: PubMed Central journal article supplement (PMC6033676)
Supplement: NIHMS971715-supplement-supplement_1.pdf [file NIHMS971715-supplement-supplement_1.pdf]

**Table S1. Administrative billing codes and cost estimates for decision tree analysis of neoadjuvant chemotherapy versus primary debulking surgery for bulky advanced epithelial ovarian cancer**

| Event                                                 | Probability |      | Cost     | Administrative billing codes** | Source                              |
|-------------------------------------------------------|-------------|------|----------|--------------------------------|-------------------------------------|
|                                                       | PDS         | NACT |          |                                |                                     |
| Debulking surgery                                     | 1.00        | 1.00 | \$2,095  | CPT 58953                      | Medicare Physician Fee Schedule[30] |
| Additional surgical procedures                        |             |      |          |                                | Medicare Physician Fee Schedule[30] |
| Pelvic lymphadenectomy or para-aortic lymphadenectomy | 0.38        | 0.43 | \$177*   | CPT 58954                      | Medicare Physician Fee Schedule[30] |
| Recto-sigmoidectomy with anastomosis                  | 0.84        | 0.15 | \$1,428  | CPT 45111, 44145               | Medicare Physician Fee Schedule[30] |
| Large/small bowel resection                           | 0.42        | 0.08 | \$1,395  | CPT 44140                      | Medicare Physician Fee Schedule[30] |
| with ostomy creation                                  | 0.38        | 0.15 | \$475    | CPT 44141, 44144               | Medicare Physician Fee Schedule[30] |
| Diaphragm stripping/resection                         | 1.00        | 0.38 | \$1,059  | CPT 39560, 39561               | Medicare Physician Fee Schedule[30] |
| Splenectomy and/or distal pancreatectomy              | 0.58        | 0.04 | \$1,032  | CPT 48140, 38100, 38102        | Medicare Physician Fee Schedule[30] |
| Liver resection                                       | 0.09        | 0.00 | \$2,423  | CPT 47120                      | Medicare Physician Fee Schedule[30] |
| Post-surgical hospitalization                         |             |      |          |                                |                                     |
| Without complications                                 |             |      | \$11,471 | DRG 738                        | HCUPnet****[29]                     |
| With major complications                              |             |      | \$27,030 | DRG 736                        | HCUPnet[29]                         |
| Readmission for late complication                     |             |      |          |                                |                                     |
| Pleural effusion                                      | 0.50        | 0.00 | \$5,543  | DRG 188                        | HCUPnet[29]                         |
| Pelvic abscess                                        | 0.33        | 0.00 | \$4,449  | DRG 759                        | HCUPnet[29]                         |
| Heart failure                                         | 0.17        | 0.00 | \$4,638  | DRG 293                        | HCUPnet[29]                         |
| Chemotherapy (3 rounds)                               |             |      |          |                                |                                     |
| Carboplatin (AUC=5***)                                |             |      | \$60     | HCPCS J9045                    | Average Sales Price[31] + 6%        |
| Paclitaxel (175 mg/m <sup>2</sup> )                   |             |      | \$528    | HCPCS J9265                    | Average Sales Price[31] + 6%        |
| IV chemotherapy administration, 4 hours               |             |      | \$665    | CPT 96412 + 96415 x3           | Medicare Physician Fee Schedule[30] |

Abbreviations: CPT, Current Procedural Terminology; DRG, Diagnosis Related Group; HCUP, Hospital Cost and Utilization Project; AUC, area under the curve; IV, intravenous

\*Represents the additional cost of CPT 58954 versus 58953

\*\*For procedures with multiple codes listed, the average of the costs was used; All costs are inflation-adjusted to 2015 US Dollars

\*\*\*AUC=5 was calculated for a 65 year-old female weighing 70 kg with a serum creatinine of 0.8 mg/dL

\*\*\*\*Based on 2014 inpatient stays

**Table S2. Utility weights associated with health states in decision tree analysis of neoadjuvant chemotherapy versus primary debulking surgery in advanced epithelial ovarian cancer**

| Health state                       | Utility weight | Time frame (months) | Source                       |
|------------------------------------|----------------|---------------------|------------------------------|
| Chemotherapy (3 rounds)            | 0.79           | 2.08                | Rowland <i>et al</i> [37]    |
| Major post-operative complications | 0.51           | 1.00                | Ebm <i>et al</i> [38]        |
| No post-operative complications    | 0.78           | 1.00                | Rowland <i>et al</i> [37]    |
| No ACT following PDS               | 0.16           | 2.70                | Havrilesky <i>et al</i> [35] |
| No IDS following NACT              |                |                     |                              |
| Progressive disease                | 0.43           | 7.42                | Havrilesky <i>et al</i> [35] |
| Last month of life among no IDS    | 0.16           | 1.00                | Havrilesky <i>et al</i> [35] |
| Post-treatment                     | 0.83           | 5.84                | Havrilesky <i>et al</i> [35] |
| Death                              | 0.00           | varies*             |                              |

Abbreviations: ACT, adjuvant chemotherapy; PDS, primary debulking surgery; IDS, interval debulking surgery; NACT, neoadjuvant chemotherapy

\*Time from death to end of time horizon

**Table S3. Outcomes and incremental cost effectiveness ratios for scenario analysis using literature-based utility weights**

|                                     | PDS    | NACT      | Difference<br>(NACT minus PDS) |
|-------------------------------------|--------|-----------|--------------------------------|
| Cost per 20,000 AEOC cases          | \$529M | \$340M    | -\$189M                        |
| Quality-adjusted life-years         | 14,095 | 15,714    | 1,619                          |
| Cost per quality-adjusted life-year |        | DOMINANT* |                                |

Abbreviations: PDS, primary debulking surgery; IDS, interval debulking surgery; NACT, neoadjuvant chemotherapy; M, millions; AEOC, advanced epithelial ovarian cancer; QALY, quality-adjusted life-year; WTP, willingness-to-pay

\*A dominant treatment strategy costs less and provides superior outcomes compared to the treatment alternative

\*\*The threshold analysis calculated the maximum difference in overall survival that would result in PDS being the cost-effective strategy at each WTP threshold
